# Supplementary material for: Identification of Novel Gene Variants for Autism Spectrum Disorders in the Lebanese Population Using Whole-Exome Sequencing
Source: MDPI journal article supplement (doi:10.3390/genes13020186), 2022-01-21

**Figure S2.** Validation of the candidate variations in the five subjects by Sanger sequencing.

- (A) Sanger sequencing confirmed a *de novo* heterozygous missense c.293C>T SNV in the *USP46* gene in subject 23, resulting in p.Pro98Leu.
- (B) Sanger sequencing confirmed a homozygous missense c.1860A>C SNV in the *SLITRK4* gene in subject 23 inherited from the mother, resulting in p.Leu620Phe.
- (C) Sanger sequencing confirmed a hemizygous missense c.1954G>A SNV in the *FLNA* gene in subject 23 inherited from the mother, resulting in p.Glu652Lys.
- (D) Sanger sequencing confirmed a *de novo* heterozygous missense c.1022G>A SNV in the *KRT2* gene in subject 45, resulting in p.Arg341His.
- (E) Sanger sequencing confirmed a *de novo* heterozygous frameshift c.471delA deletion in the *MIS18BP1* gene in subject 45, resulting in p.Lys157AsnfsTer24.
- (F) Sanger sequencing confirmed a homozygous missense c.371T>C SNV in the *HAAO* gene in subject 45 inherited from both parents, resulting in p.Met124Thr.
- (G) Sanger sequencing confirmed a hemizygous missense c.1804A>G SNV in the *PTCHD1* gene in subject 64, resulting in p.Thr602Ala.
- (H) Sanger sequencing confirmed a hemizygous missense c.2590G>T SNV in the *FLNA* gene in subject 64, resulting in p.Val864Phe.
- (I) Sanger sequencing confirmed a homozygous missense c.5560G>A SNV in the *ASXL3* gene in subject 70 inherited from both parents, resulting in p.Val1854Ile.
- (J) Sanger sequencing confirmed a *de novo* heterozygous missense c.97G>T SNV in the *LSMEM2* gene in subject 73, resulting in p.Gly33Trp.

**Subject 23 (A) *USP46*: c.293C>T**

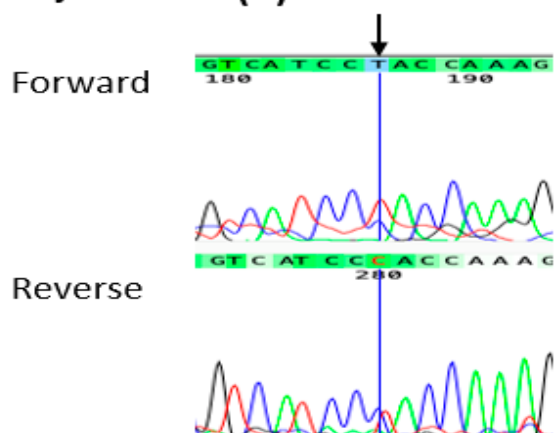

**Mother 24**

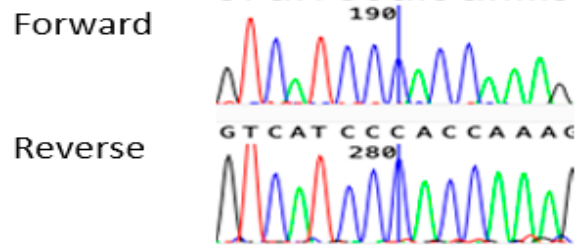

**Father 25**

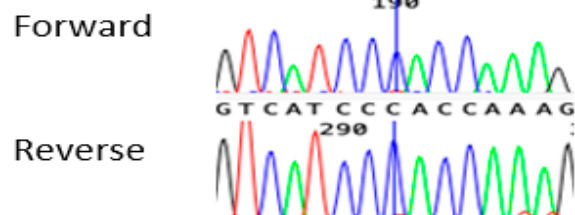

**Subject 23 (B) *SLITRK4*: c.1860A>C**

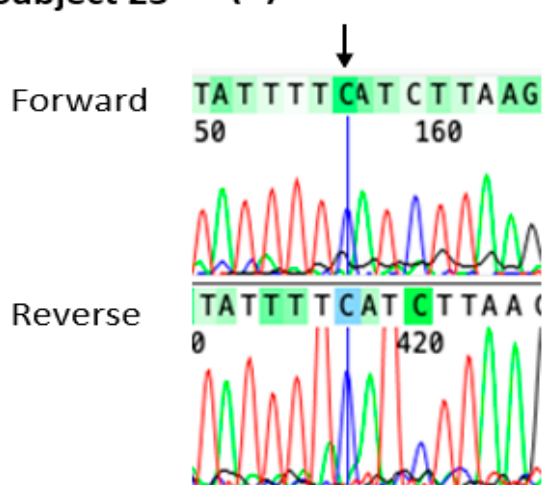

**Mother 24**

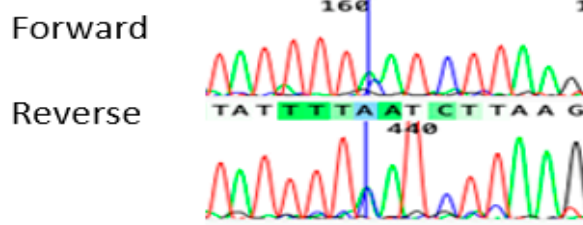

**Father 25**

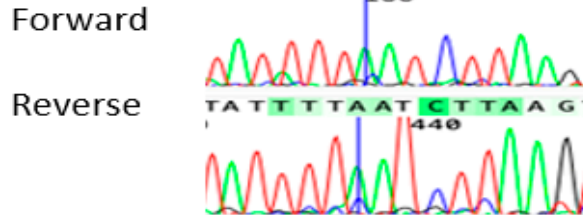

**Subject 23 (C) *FLNA*: c.1954G>A**

Forward

ACAGCAAAGACATC  
80 90

Reverse

ACAGCAAAAGACATC  
420

ACAGCAAAGACATC  
80 90

**Mother 24**

Forward

ACAGCAAAGACATC  
240 250

Reverse

ACAGCAAAGACATC  
80 90

**Father 25**

Forward

ACAGCAAAGACATC  
200

Reverse

**Subject 45 (D) *KRT2*: c.1022G>A**

Forward

CAGCCCAACCTGG  
130

Reverse

CAGCCGCAACCTGG  
330

**Mother 24**

Forward

CAGCCGCAACCTGG  
130

Reverse

CAGCCGCAACCTGG  
420

**Father 25**

Forward

CAGCCGCAACCTGG  
130

Reverse

CAGCCGCAACCTGG  
360 370

**Subject 45** (E) *MIS18BP1*: c.471delA

Forward

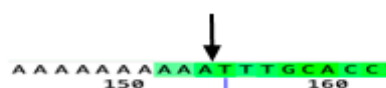

Reverse

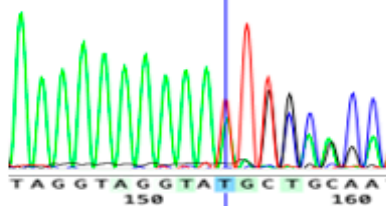

**Mother 24**

Forward

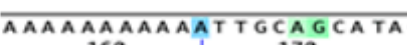

Reverse

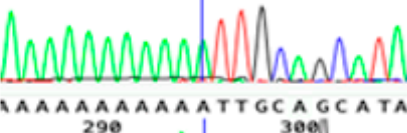

**Father 25**

Forward

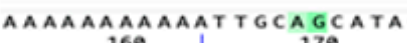

Reverse

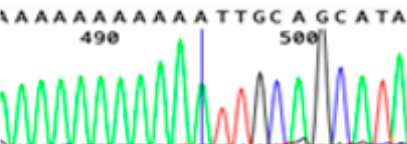

**Subject 45** (F) *HAAO*: c.371T>C

Forward

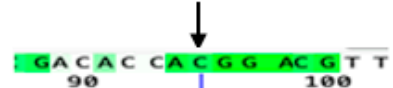

Reverse

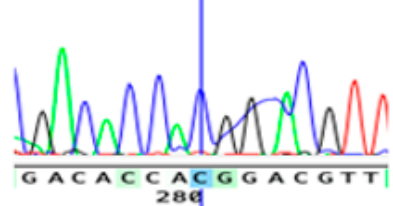

**Mother 24**

Forward

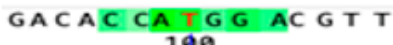

Reverse

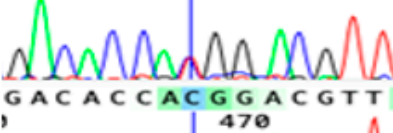

**Father 25**

Forward

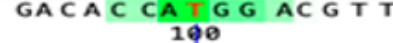

Reverse

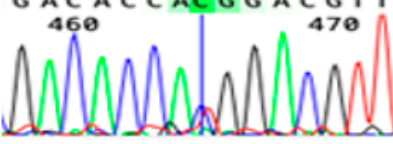

Subject 64 (G) PTCHD1: c.1804A>G

Forward

ATGTATCCGCTGGC  
240

Reverse

ATGTATCCGCTGGC  
60 270

Father 63

Forward

ATGTATCCACTGGC  
240

Reverse

ATGTATCCACTGGC  
340 350

Subject 64 (H) FLNA: c.2590G>T

Forward

ATCCGATTCAAGG  
70 80

Reverse

ATCCGATTCAAGG  
70 180

Father 63

Forward

ATCCGAGTCAAGG  
70 80

Reverse

ATCCGAGTCAAGG  
0 220

**Subject 70 (I) ASXL3: c.5560G>A**

Forward

CCA G AT ATTA AA  
220

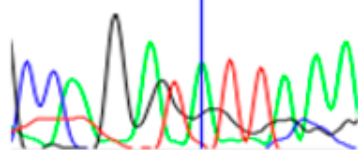

Reverse

CC AG A TATTA AA  
260

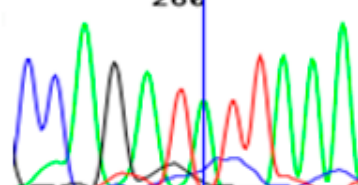

**Mother 69**

Forward

C CA G ATGT TAA A  
220

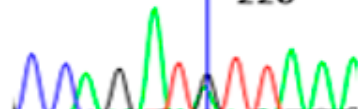

Reverse

CC AG A TGT TAA A  
390

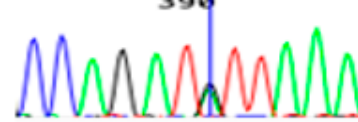

**Father 68**

Forward

C CA G ATGT TAA A  
220

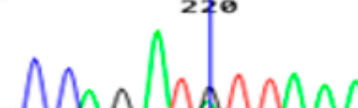

Reverse

CC AG A TGT TAA A  
320

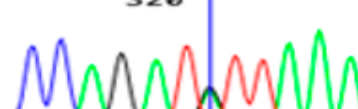

**Subject 73 (J) LSMEM2: c.97G>T**

Forward

AGC AGG C GGC CTT  
130 140

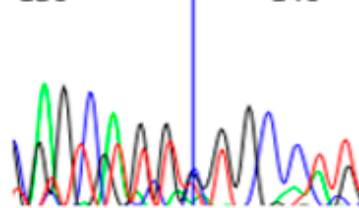

Reverse

AGC AGG TGG C CAT  
160

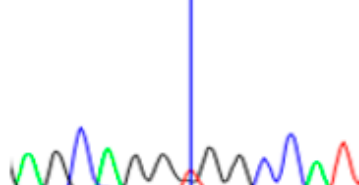

**Mother 71**

Forward

T C CT CTG G C TG G GC  
580 590

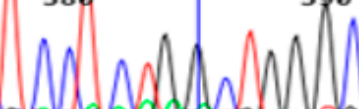

Reverse

TC CT CTGG C TG G GC  
310 320

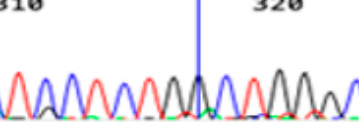

**Father 72**

Forward

T C CT CTG G C TG G GC  
580 590

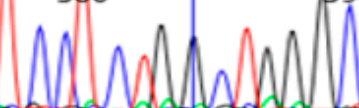

Reverse

TC CT CTGG C TG G GC  
310 320

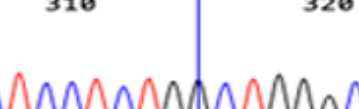

Supplement: s1 [file s1]
