# Supplementary material for: Identification of Novel Gene Variants for Autism Spectrum Disorders in the Lebanese Population Using Whole-Exome Sequencing
Source: MDPI journal article supplement (doi:10.3390/genes13020186), 2022-01-21
Supplement: s1 [file s1]

**Table S1.** Primer sequences for amplification and sequencing of the candidate genes regions containing the variants.

| Subject | Gene     | Forward primer (5' → 3') | Reverse primer (5' → 3') | Amplicon size (pb) |
|---------|----------|--------------------------|--------------------------|--------------------|
| 23      | USP46    | TGACTTGAGCCATCCCTCTT     | ATGCCAGCTCTTCCTTTTGA     | 333                |
|         | SLITRK4  | TGAGACGCCTGTTCAGTTTG     | GGTTTTGTGGTCATGCTTCC     | 346                |
|         | FLNA     | CGCAGGCTAAGATCGAATGT     | TGAACTCTGCTGGCTTGTTG     | 390                |
| 45      | KRT2     | CCCTTATGCTGGGAGACAGA     | GGTGCCATTCTCAACATCCT     | 394                |
|         | MIS18BP1 | TAAAGCCCAACAAGGATGGA     | GAGCTACACAAGGGCAAGGA     | 386                |
|         | HAAO     | TGCAGGGACTTCTACAAGCA     | ACAGCTGTGTGTCTGCCATC     | 369                |
| 64      | PTCHD1   | TGCCTTAATGGGCTATCTGC     | GGCCACTACATCGACCTCAT     | 391                |
|         | FLNA     | CTGGCCGCTAAGATGTCATT     | CCCTTGGTGAGTCCTGAGAA     | 348                |
| 70      | ASXL3    | AATCAACAGGCTTCCATTGC     | CTGTTTGACCTCAGGGCTGT     | 367                |
| 73      | LSMEM2   | TTGGAACCAAATGTCCCACT     | CACTAGGCAAGTGAGCACCA     | 482                |
