# Supplementary material for: Identification of Novel Gene Variants for Autism Spectrum Disorders in the Lebanese Population Using Whole-Exome Sequencing
Source: MDPI journal article supplement (doi:10.3390/genes13020186), 2022-01-21

**Figure S1. Integrated Genome Browser visualization (IGV) of the variants.**

- A- G > T variant change in *SLITRK4* gene in the heterozygous form for the parents (lower panel) and the hemizygous form for subject number 23 (upper panel).
- B- T >AT variant change in *MIS18BP1* gene in the heterozygous form for the subject number 45 (upper panels) as compared to other samples included in the study.
- C- G > A variant change in *HAAO* gene in the heterozygous form for the parents (lower panels) and the homozygous form for subject number 45 (upper panel).
- D- A>G variant change in *PTCHD1* gene in the hemizygous form for subject number 64 (lower panel) as compared to other samples included in the study.
- E- G>A variant change in *ASXL3* gene in the homozygous form for subject number 70 (lower panel) as compared to other samples included in the study.
- F- T>TGGAG variant change in *KRTAP5-5* gene in the homozygous form for subject number 73 (upper panel), in the homozygous form for the father and in the heterozygous form for the mother (lower panels).

A-

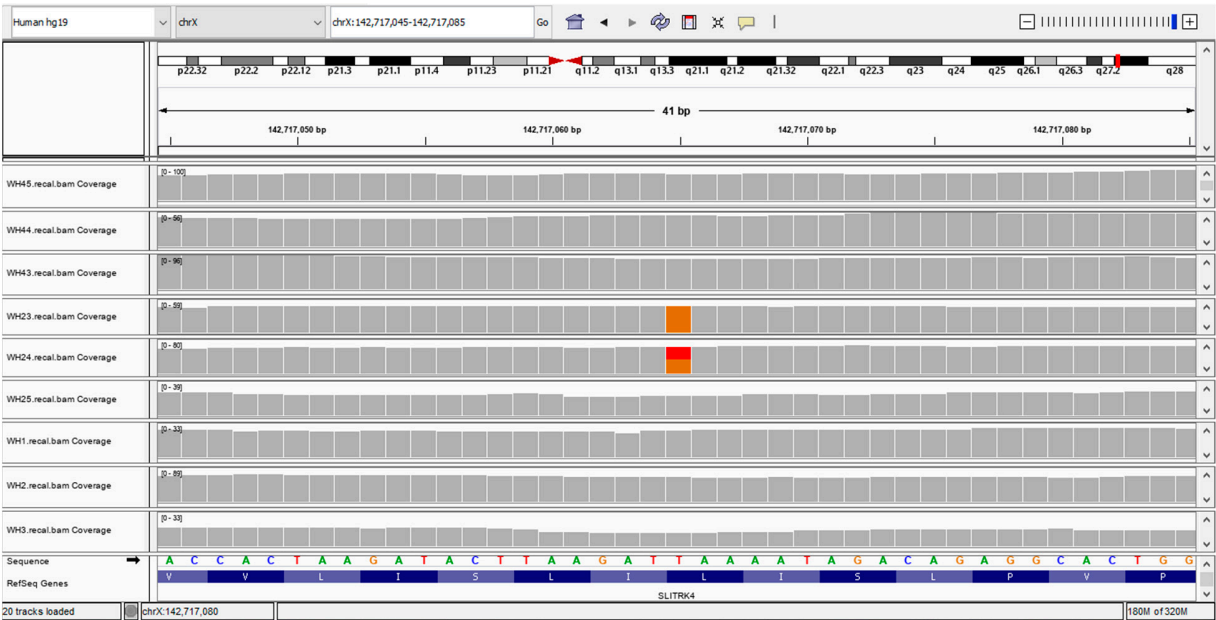

B-

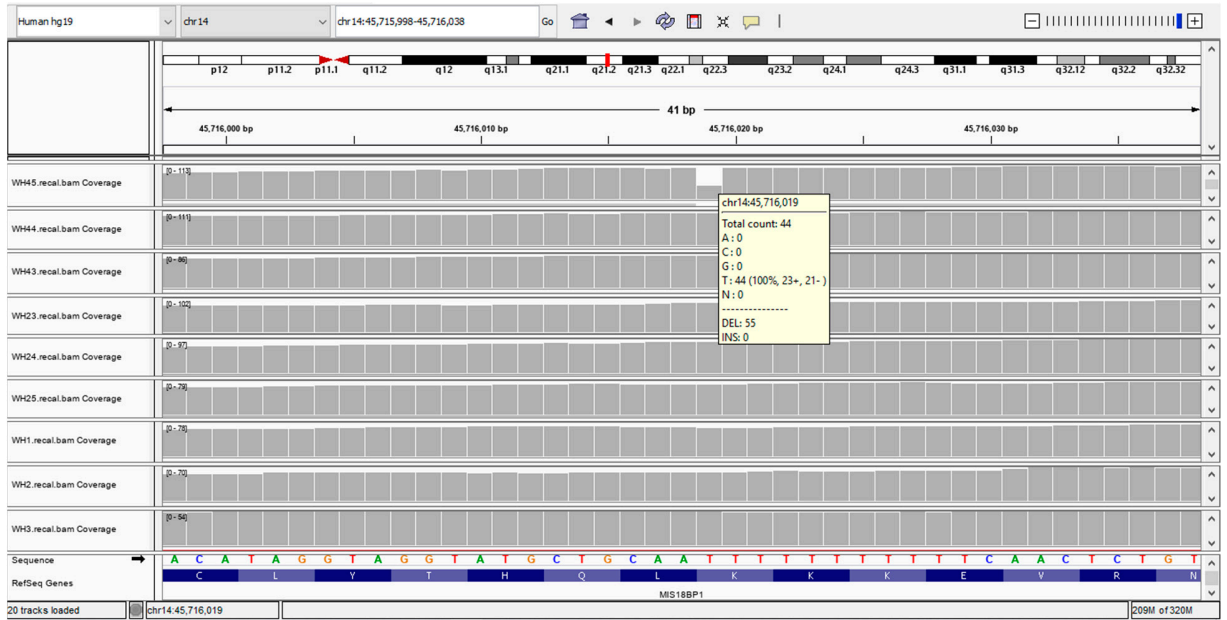

C-

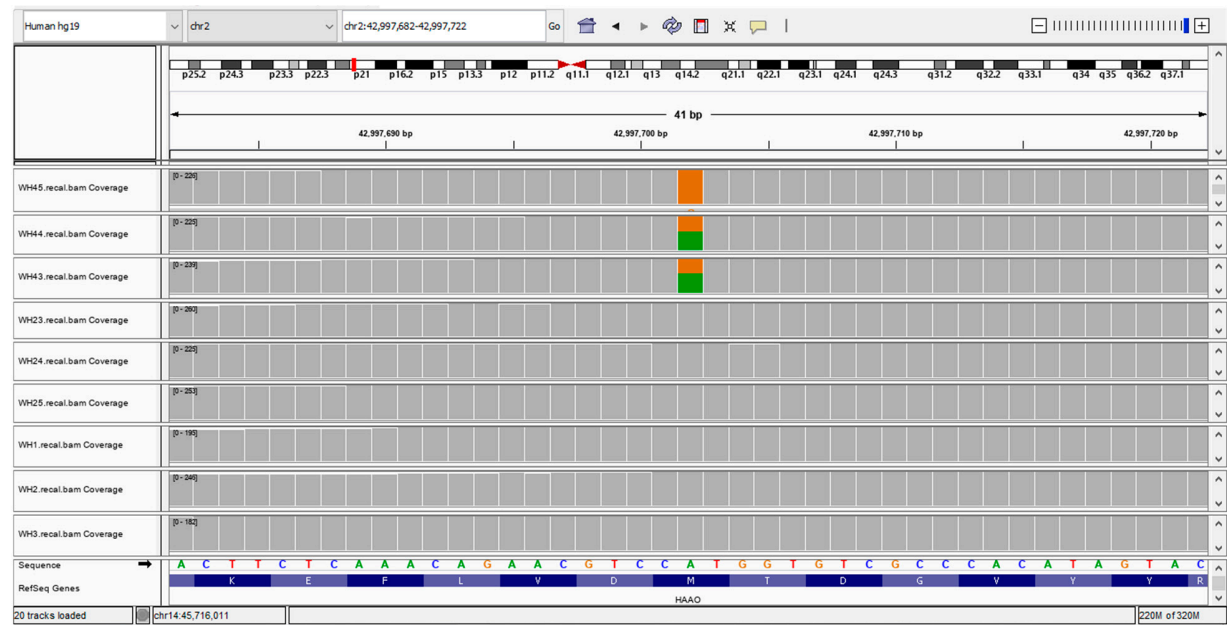

D-

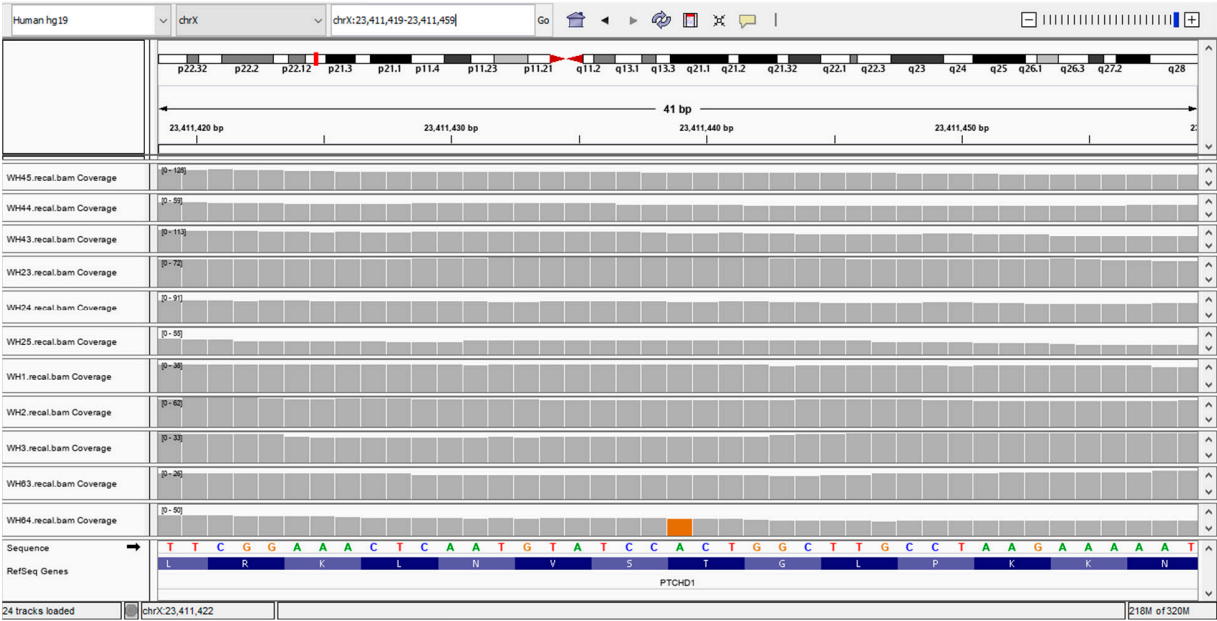

E-

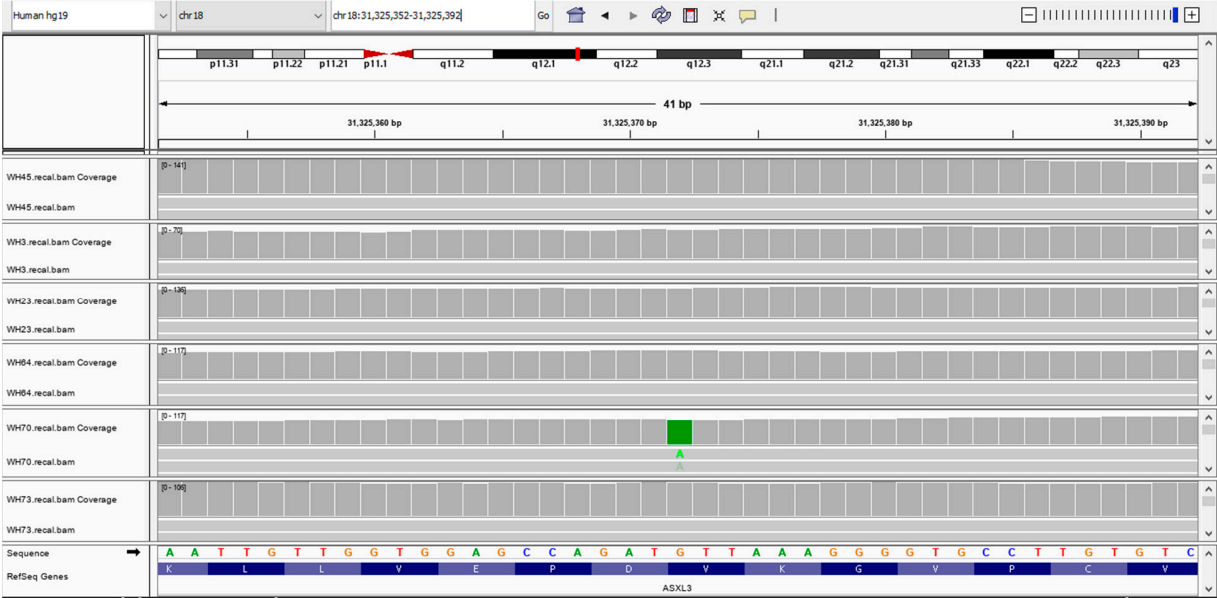

F-

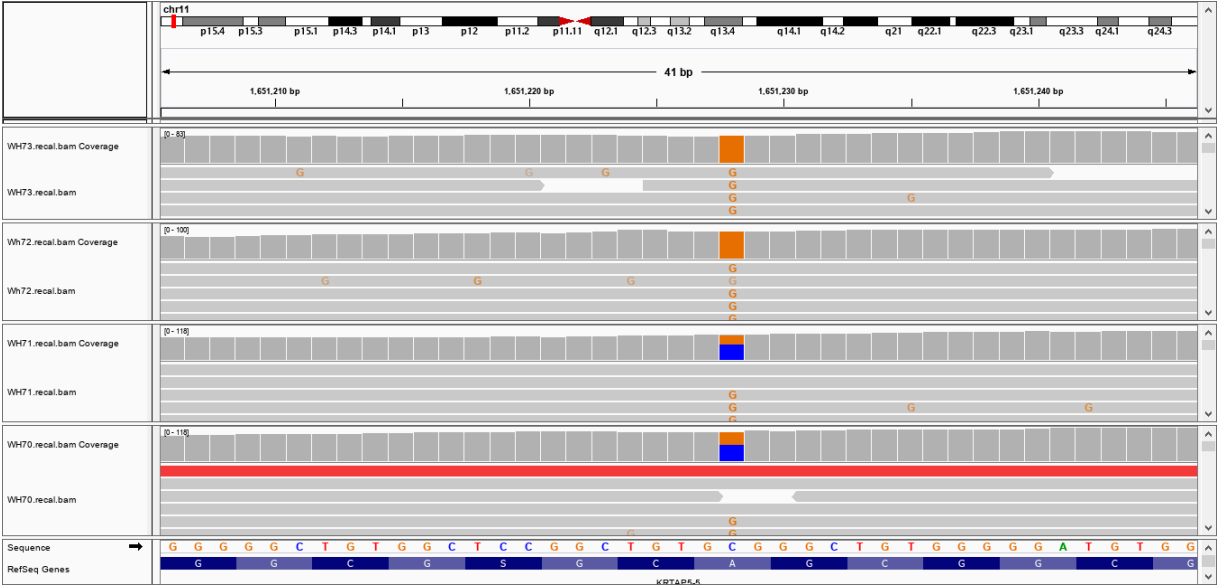

Supplement: s1 [file s1]
